# Supplementary material
Source: HighWire-hosted journal article supplement (http://www.cmaj.ca/highwire/filestream/59168/field_highwire_adjunct_files/4/birth-urquia-5-at.pdf)
Supplement: birth-urquia-5-at.pdf [file birth-urquia-5-at.pdf]

**Appendix 5: Adverse neonatal and obstetric outcomes among 328 387 singleton live births to immigrant women according to the method used to classify infants as large for gestational age (LGA) (≥ 90th percentile)**

**Green** = infants classified as LGA according to the birth-weight curve for newborns of Canadian-born women but not according to the birth-weight curve for newborns of women from their respective world region of origin

**Blue** = infants classified as LGA on both curves

**Black** = infants classified as not LGA on either curve

| Outcome                                     | Not LGA on either curve<br>(n = 296 421)<br><br>No. events<br>(rate per 1000) | LGA on world region curve only<br>(n = 14 282)<br><br>No. events<br>(rate per 1000) | LGA on both curves<br>(n = 17 684)<br><br>No. events<br>(rate per 1000) | LGA on world region curve only v. not LGA on either curve |                               | LGA on both curves v. not LGA on either curve |                               |
|---------------------------------------------|-------------------------------------------------------------------------------|-------------------------------------------------------------------------------------|-------------------------------------------------------------------------|-----------------------------------------------------------|-------------------------------|-----------------------------------------------|-------------------------------|
|                                             |                                                                               |                                                                                     |                                                                         | Crude odds ratio<br>(95% CI)                              | Adjusted odds ratio (95% CI)* | Crude odds ratio<br>(95% CI)                  | Adjusted odds ratio (95% CI)* |
| <b>Neonatal</b>                             |                                                                               |                                                                                     |                                                                         |                                                           |                               |                                               |                               |
| Neonatal death < 28 days**                  | 521 (1.8)                                                                     | 10 (0.7)                                                                            | 26 (1.5)                                                                | 0.40 (0.21 to 0.75)                                       | 0.41 (0.22 to 0.77)           | 0.84 (0.56 to 1.24)                           | 0.83 (0.56 to 1.24)           |
| Newborn hospital length of stay ≥ 7 days    | 9987 (33.7)                                                                   | 268 (18.8)                                                                          | 626 (35.4)                                                              | 0.55 (0.49 to 0.62)                                       | 0.55 (0.49 to 0.62)           | 1.05 (0.97 to 1.14)                           | 1.09 (1.01 to 1.19)           |
| NICU admission                              | 37 479 (126.4)                                                                | 1909 (133.7)                                                                        | 3354 (189.7)                                                            | 1.07 (1.02 to 1.12)                                       | 1.06 (1.01 to 1.11)           | 1.62 (1.56 to 1.68)                           | 1.77 (1.70 to 1.84)           |
| Mechanical ventilation                      | 6460 (21.8)                                                                   | 263 (18.4)                                                                          | 528 (29.9)                                                              | 0.84 (0.74 to 0.95)                                       | 0.92 (0.81 to 1.05)           | 1.38 (1.26 to 1.51)                           | 1.38 (1.26 to 1.51)           |
| Birth trauma                                | 3427 (11.6)                                                                   | 241 (16.9)                                                                          | 462 (26.1)                                                              | 1.47 (1.29 to 1.68)                                       | 1.55 (1.36 to 1.77)           | 2.29 (2.08 to 2.53)                           | 2.59 (2.34 to 2.86)           |
| <b>Obstetric</b>                            |                                                                               |                                                                                     |                                                                         |                                                           |                               |                                               |                               |
| Third- or fourth-degree perineal laceration | 8928 (30.1)                                                                   | 644 (45.1)                                                                          | 776 (43.9)                                                              | 1.52 (1.40 to 1.65)                                       | 1.63 (1.50 to 1.78)           | 1.48 (1.37 to 1.59)                           | 1.93 (1.79 to 2.09)           |
| Obstructed labour due to shoulder dystocia  | 3325 (11.2)                                                                   | 711 (49.8)                                                                          | 1601 (90.5)                                                             | 4.61 (4.25 to 5.02)                                       | 4.71 (4.33 to 5.13)           | 8.78 (8.25 to 9.33)                           | 8.38 (7.87 to 8.92)           |
| Postpartum hemorrhage                       | 8133 (27.5)                                                                   | 565 (39.6)                                                                          | 854 (48.3)                                                              | 1.46 (1.34 to 1.59)                                       | 1.53 (1.40 to 1.67)           | 1.80 (1.67 to 1.93)                           | 1.84 (1.71 to 1.98)           |

Note: CI = confidence interval, NICU = neonatal intensive care unit.

\*Adjusted for maternal age, parity, year of delivery, maternal education, marital status, refugee status, knowledge of Canadian languages, duration of residence in Canada, world region of origin and neighborhood income quintiles.

\*\*Neonatal deaths were not separated for preterm and term infants because of very low event rates and counts fewer than 5.
